# Supplementary material for: The effect of using binary mixtures of zwitterionic and charged lipids on nanodisc formation and stability
Source: Royal Society of Chemistry journal article supplement (doi:10.1039/c2sm27000e), 2013-01-01
Supplement: c2sm27000e.pdf [file c2sm27000e.pdf]

# Supporting information

## The Effect of Using Binary Mixtures of Zwitterionic and Charged Lipids on the Nanodisc Formation and Stability

Maria Wadsäter, Selma Maric, Jens B. Simonsen, Kell Mortensen and Marité Cardenas.

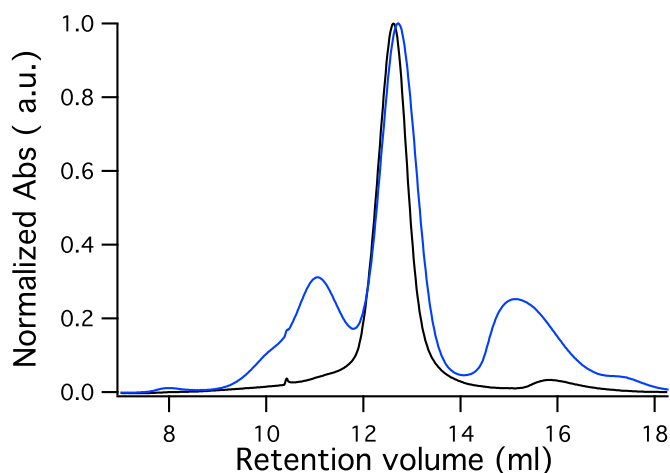

**Figure SI 1.** Size exclusion chromatograms of DMPC nanodiscs prepared at a DMPC to MSP1D1 ratio of 90:1 in presence (black) and absence (blue) of 20 mM sodium cholate.

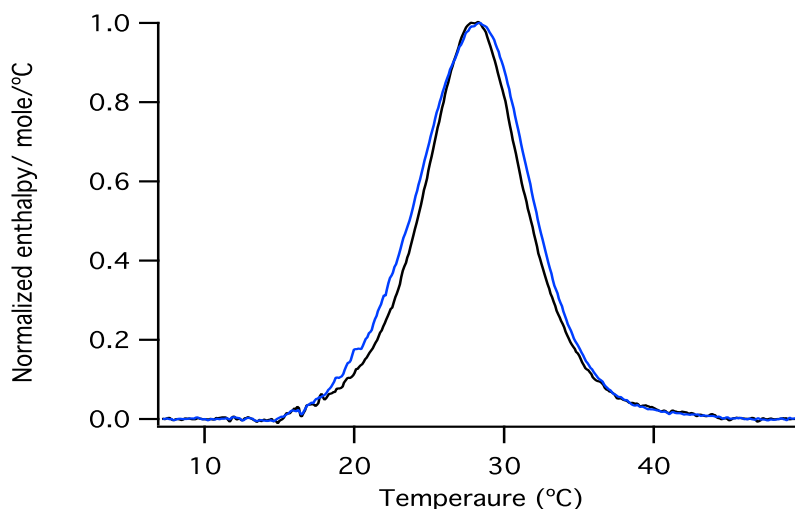

**Figure SI 2.** Differential Scanning Calorimetry data of DMPC nanodiscs prepared at a DMPC to MSP1D1 ratio of 90:1 in presence (black) and absence (blue) of 20 mM sodium cholate.
